CORRECTION

# Correction: Epidermal Growth Factor Receptor in Prostate Cancer Derived Exosomes

Geetanjali Kharmate, Elham Hosseini-Beheshti, Josselin Caradec, Mei Yieng Chin, Emma S. Tomlinson Guns

[Fig 4A](#) shows expression of CD-9 in small, medium, and large tumor bearing mice. There are erroneously 5 lanes in the figure; the fifth lane was a duplication of large tumor sample from another mouse. Please view the correct [Fig 4](#), without the extraneous lane in panel A, here.

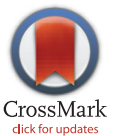

 OPEN ACCESS

**Citation:** Kharmate G, Hosseini-Beheshti E, Caradec J, Chin MY, Tomlinson Guns ES (2016) Correction: Epidermal Growth Factor Receptor in Prostate Cancer Derived Exosomes. PLoS ONE 11(6): e0157392. doi:10.1371/journal.pone.0157392

**Published:** June 13, 2016

**Copyright:** © 2016 Kharmate et al. This is an open access article distributed under the terms of the [Creative Commons Attribution License](#), which permits unrestricted use, distribution, and reproduction in any medium, provided the original author and source are credited.

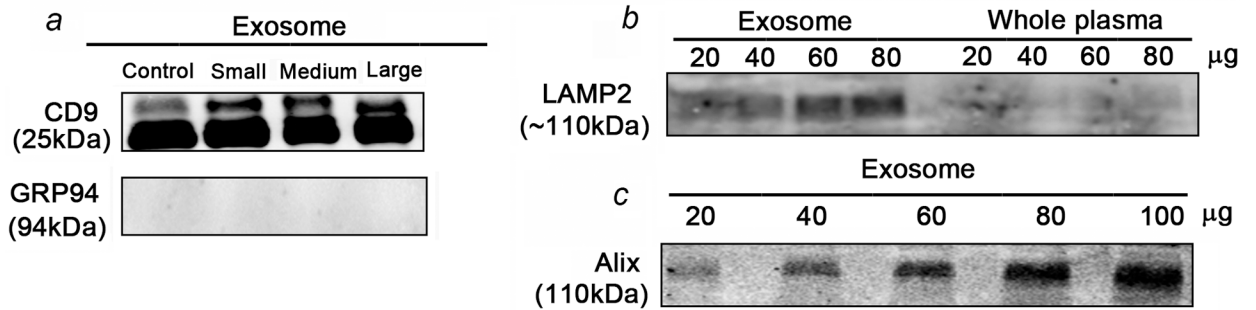

**Fig 4. Exosome isolation from plasma is validated by the presence of exosome markers.** a) CD9 was present in exosomes derived from LNCaP xenograft mice bearing small, medium and large LNCaP tumours whereas the control mouse serum lacked CD9. GRP94, a known endoplasmic reticulum protein which is used as a negative control was absent in the exosomes suggesting enrichment b) LAMP2 was present in exosomes derived from PCa patient plasma whereas absence of LAMP2 in whole plasma indicated successful enrichment. c) Alix was present in exosomes derived from patient plasma at different exosomal protein concentrations.

doi:10.1371/journal.pone.0157392.g001

## Supporting Information

**S1 File. Uncropped blot for Fig 4A.**

(TIF)

## Reference

1. Kharmate G, Hosseini-Beheshti E, Caradec J, Chin MY, Tomlinson Guns ES (2016) Epidermal Growth Factor Receptor in Prostate Cancer Derived Exosomes. PLoS ONE 11(5): e0154967. doi: [10.1371/journal.pone.0154967](https://doi.org/10.1371/journal.pone.0154967) PMID: [27152724](https://pubmed.ncbi.nlm.nih.gov/27152724/)
